# Supplementary material for: Breeding for Prolificacy, Total Carotenoids and Resistance to Downy Mildew in Small-Ear Waxy Corn by Modified Mass Selection
Source: MDPI journal article supplement (doi:10.3390/agronomy11091793), 2021-09-07
Supplement: s1 [file s1]

## Supplementary Table

**Supplementary Table S1.** Means of disease incidence (DI), disease severity index (DSI), the area under the disease-progress curve of disease incidence (AUDPC-DI), the area under the disease-progress curve of disease severity index (AUDPC-DSI) and resistance levels of downy mildew of 5 plant ages in 23 small-ear waxy corn varieties at Nong Bau Village, in rainy season 2020, at Banphang, Khon Kaen.

| Varieties            | Disease incidence (%) |          |          |          |         | AUDPC    | Disease severity index (%) |          |          |          |          | AUDPC    | Resistance |         |
|----------------------|-----------------------|----------|----------|----------|---------|----------|----------------------------|----------|----------|----------|----------|----------|------------|---------|
|                      | 14 days               | 21 days  | 28 days  | 35 days  | 42 days |          | DI                         | 14 days  | 21 days  | 28 days  | 35 days  |          |            | 42 days |
| Group C              |                       |          |          |          |         |          |                            |          |          |          |          |          |            |         |
| Nei9008/TY-23-5-B    | 8.3 b                 | 91.8 a-d | 98.2 a   | 100.0 a  | 100.0 a | 2409 a-c | 2.1 b                      | 27.5 b-e | 45.0 a-e | 52.1 a-f | 58.8 b-e | 1086 a-f | S          |         |
| Nei9008/BK-17-5-B    | 0 b                   | 86.1 a-g | 74.5 g-k | 92.0 b-f | 100.0 a | 2118 g-m | 0 b                        | 24.5 b-g | 23.1 f-i | 29.3 g-i | 41.2 c-i | 683 f-l  | MS         |         |
| Nei9008/BK-24-2-B    | 5.6 b                 | 91.0 a-e | 94.5a-f  | 100.0 a  | 100.0 a | 2368 a-f | 1.4 b                      | 25.6 b-f | 32.1 c-i | 32.3 f-i | 35.9 e-i | 761 c-l  | MS         |         |
| TY/TF-18-12-B        | 1.9 b                 | 85.4 a-g | 93.8 a-f | 98.2 ab  | 100.0 a | 2298 a-i | 0.5 b                      | 21.6 c-i | 25.9 e-i | 26.8 hi  | 31.0 g-l | 630 g-l  | MS         |         |
| Nei9008/BK-24-9-B    | 0 b                   | 82.9 a-g | 79.3 d-i | 86.9 e-h | 89.9 d  | 2057 i-n | 0 b                        | 21.6 c-i | 21.2 g-i | 22.8 i   | 24.4 h-l | 545 i-l  | MR         |         |
| TY/TF-6-2-B          | 5.9 b                 | 88.9 a-f | 90.6 a-g | 100.0 a  | 100.0 a | 2327 a-h | 1.5 b                      | 24.4 b-g | 26.6 e-i | 30.3 g-i | 34.7 e-j | 695 f-l  | MS         |         |
| TY/TF-8-1-B          | 1.8 b                 | 90.2 a-f | 84.0 a-i | 100.0 a  | 100.0 a | 2275 a-j | 0.4 b                      | 23.4 b-h | 38.6 a-g | 47.1 b-h | 57.4 c-f | 967 c-h  | S          |         |
| TY/TF-3-8-B          | 4.6 b                 | 75.3 a-j | 87.0 a-h | 100.0 a  | 100.0 a | 2202 c-k | 1.1 b                      | 18.8 e-i | 24.6 f-i | 32.9 f-i | 39.6 f-i | 677 f-l  | MS         |         |
| TF/BK-17-2-B         | 1.7 b                 | 71.5 c-j | 94.7 a-e | 100.0 a  | 100.0 a | 2218 b-k | 0.4 b                      | 19.2 e-i | 33.6 b-i | 32.6 f-i | 45.9 c-i | 761 c-l  | MS         |         |
| TY/TF-33-1-B         | 1.7 b                 | 58.8 h-j | 61.6 jk  | 90.9 c-f | 30.0 e  | 1590 q   | 0.4 b                      | 15.8 g-i | 18.2 hi  | 24.2 i   | 7.9 kl   | 437 kl   | R          |         |
| Group E              |                       |          |          |          |         |          |                            |          |          |          |          |          |            |         |
| Nei9008/TY-4-3-B     | 0 b                   | 73.4 b-j | 88.7 a-h | 96.5 a-c | 100.0 a | 2159 d-l | 0 b                        | 19.0 e-i | 27.8 e-i | 29.0 g-i | 34.0 e-j | 650 g-l  | MS         |         |
| Nei9008/TY-9-2-B     | 2.3 b                 | 97.2 a   | 99.2 a   | 100.0 a  | 100.0 a | 2433 a-c | 0.6 b                      | 27.5 b-e | 36.4 b-h | 36.9 c-i | 43.3 c-i | 859 c-j  | MS         |         |
| TY/Nei9008-34-5-B    | 0 b                   | 91.2 a-e | 94.0 a-f | 100.0 a  | 100.0 a | 2346 a-g | 0 b                        | 23.8 b-g | 29.7 d-i | 31.9 f-i | 34.4 e-j | 718 e-l  | MS         |         |
| Nei9008/TY-9-1-B     | 6.7 b                 | 92.9 a-d | 96.3 a-d | 98.4 ab  | 100.0 a | 2386 a-e | 2.7 b                      | 30.1 a-c | 36.2 b-i | 39.4 c-i | 50.5 c-g | 926 c-i  | MS         |         |
| TY/Nei9008-37-3-B    | 2.0 b                 | 86.6 a-g | 83.0 a-i | 95.1 a-d | 100.0 a | 2209 c-k | 0.5 b                      | 21.9 c-i | 24.1 f-i | 26.5 i   | 33.3 e-k | 626 g-l  | MS         |         |
| Nei9008/TY-23-1-B    | 0 b                   | 85.4 a-g | 87.8 a-h | 94.2 a-d | 97.5 ab | 2213 b-k | 0 b                        | 21.8 c-i | 23.2 f-i | 24.9 i   | 27.3 g-l | 585 h-l  | MS         |         |
| TY/TF-27-1-B         | 4.4 b                 | 66.9 f-j | 71.7 h-k | 98.9 a   | 100.0 a | 2028 j-o | 1.1 b                      | 18.1 f-i | 22.7 f-i | 33.6 f-i | 37.8 e-i | 657 g-l  | MS         |         |
| Nei9008              | 1.9 b                 | 79.6 a-h | 80.9 b-i | 82.5 gh  | 33.0 e  | 1822 n-q | 0.7 b                      | 23.9 b-g | 22.6 f-i | 23.4 i   | 8.9 j-l  | 523 i-l  | R          |         |
| Takpha1              | 0 b                   | 54.8 ij  | 79.8 c-i | 95.2 a-d | 92.3 cd | 1932 l-o | 0 b                        | 14.2 i   | 21.395   | 25.7 i   | 24.3 h-l | 514 j-l  | MR         |         |
| Tein Leang Khan Kaen | 1.9 b                 | 85.7 a-g | 98.1 ab  | 89.0 d-g | 95.5 bc | 2249 b-k | 1.0 b                      | 25.7 b-f | 41.4 a-f | 47.7 b-g | 59.3 b-e | 1015 b-g | S          |         |
| Tein Ban Kao         | 8 b                   | 98.4 a   | 100.0 a  | 99.0 a   | 100.0 a | 2249 ab  | 3.0 b                      | 32.1 ab  | 58.1 a   | 68.9 a   | 85.8 a   | 1425 a   | HS         |         |
| Tein Lai-52          | 19.0 a                | 98.3 a   | 100.0 a  | 100.0 a  | 100.0 a | 2250 a   | 8.6 a                      | 36.6 a   | 51.9 ab  | 63.5 ab  | 89.9 a   | 1408 ab  | HS         |         |
| Tein Ayutthaya 60    | 3.2 b                 | 79.6 a-h | 99.1 a   | 100.0 a  | 100.0 a | 2249 ab  | 1.6 b                      | 20.5 d-i | 41.7 a-f | 54.3 a-e | 84.6 ab  | 1117 a-e | HS         |         |
| CV (%)               | 34.0                  | 12.9     | 11.2     | 4.4      | 3.0     | 6.2      | 44.0                       | 20.3     | 32.3     | 25.3     | 26.2     | 25.4     | -          |         |

Means followed by different letters within the same column are significantly different based on LSD at  $P \leq 0.05$ . HR= 0%infection (no symptom), R=1-10% infection, MR=11-25% infection, MS=26-50%infection, S=51-75% infection and HS=76-100% infection

**Supplementary Table S2.** Means for disease incidence (DI), disease severity index (DSI), the area under the disease-progress curve of disease incidence (AUDPC-DI), the area under the disease-progress curve of disease severity index (AUDPC-DSI) and resistance levels of downy mildew of 5 plant ages in 23 small-ear waxy corn varieties at Sok Maung Village, in rainy season 2020, at Banphang, Khon Kaen.

| Varieties            | Disease incidence (%) |          |         |          |          | AUDPC    | Disease severity index (%) |         |          |         |          | AUDPC    | Resistance |
|----------------------|-----------------------|----------|---------|----------|----------|----------|----------------------------|---------|----------|---------|----------|----------|------------|
|                      | 14 days               | 21 days  | 28 days | 35 days  | 42 days  | DI       | 14 days                    | 21 days | 28 days  | 35 days | 42 days  | DSI      | Level      |
| Group C              |                       |          |         |          |          |          |                            |         |          |         |          |          |            |
| Nei9008/TY-23-5-B    | 100.0 a               | 93.9 a-d | 100.0 a | 91.6 a-j | 100.0 a  | 2579 a-e | 69.5 a-f                   | 100.0 a | 89.0 a-d | 100.0 a | 89.3 c-i | 2691 a-h | HS         |
| Nei9008/BK-17-5-B    | 100.0 a               | 73.4 j-n | 100.0 a | 78.0 h-p | 93.8 a-d | 2470 b-l | 65.4 b-i                   | 100.0 a | 77.2 c-h | 100.0 a | 85.7 e-k | 2465 k-n | HS         |
| Nei9008/BK-24-2-B    | 100.0 a               | 80.1 c-m | 100.0 a | 68.1 pq  | 92.9 b-d | 2277 l-n | 50.2 g-m                   | 100.0 a | 63.7 ij  | 100.0 a | 73.0 l   | 2430 mn  | HS         |
| TY/TF-18-12-B        | 100.0 a               | 73.0 k-n | 100.0 a | 73.4 n-q | 100.0 a  | 2361 h-n | 53.4 f-m                   | 100.0 a | 67.9 g-j | 100.0 a | 85.3 e-k | 2466 k-n | HS         |
| Nei9008/BK-24-9-B    | 100.0 a               | 79.1 e-m | 100.0 a | 75.7 l-p | 91.7 d   | 2431 d-m | 57.1 c-l                   | 100.0 a | 74.6 e-i | 100.0 a | 88.2 c-j | 2499 j-m | HS         |
| TY/TF-6-2-B          | 100.0 a               | 93.2 a-e | 100.0 a | 92.2 a-i | 100.0 a  | 2477 b-k | 57.1 c-l                   | 100.0 a | 78.8 b-h | 100.0 a | 93.0 a-g | 2701 a-g | HS         |
| TY/TF-8-1-B          | 100.0 a               | 92.0 a-g | 100.0 a | 93.5 a-g | 100.0 a  | 2454 c-m | 59.2 b-l                   | 100.0 a | 75.6 e-i | 100.0 a | 90.8 a-i | 2689 a-h | HS         |
| TY/TF-3-8-B          | 98.5 a                | 73.6 j-n | 100.0 a | 74.7 m-p | 100.0 a  | 2442 l-n | 62.7 b-k                   | 100.0 a | 75.1 e-i | 100.0 a | 77.4 kl  | 2411 d-m | HS         |
| TF/BK-17-2-B         | 100.0 a               | 60.2 n-p | 100.0 a | 71.3 o-p | 100.0 a  | 2328 no  | 43.3 lm                    | 100.0 a | 72.5 f-i | 100.0 a | 73.3 l   | 2316 j-n | HS         |
| TY/TF-33-1-B         | 100.0 a               | 85.8 a-l | 100.0 a | 90.7 a-k | 100.0 a  | 2528 a-h | 58.9 b-l                   | 100.0 a | 84.8 a-f | 100.0 a | 93.8 a-f | 2647 a-j | HS         |
| Group E              |                       |          |         |          |          |          |                            |         |          |         |          |          |            |
| Nei9008/TY-4-3-B     | 100.0 a               | 79.7 d-m | 100.0 a | 81.3 e-p | 100.0 a  | 2394 e-m | 54.5 e-m                   | 100.0 a | 72.3 f-i | 100.0 a | 84.8 f-k | 2539 h-m | HS         |
| Nei9008/TY-9-2-B     | 100.0 a               | 95.4 ab  | 100.0 a | 93.8 a-g | 96.7 a-d | 2583 a-e | 61.3 b-k                   | 100.0 a | 90.0 a-c | 100.0 a | 96.7 a-c | 2723 a-e | HS         |
| TY/Nei9008-34-5-B    | 98.9 a                | 81.7 b-m | 97.9 a  | 77.5 i-p | 91.9 cd  | 2178 no  | 50.3 g-m                   | 50.0 b  | 72.9 f-i | 100.0 a | 77.1 kl  | 2467 k-n | HS         |
| Nei9008/TY-9-1-B     | 100.0 a               | 91.2 a-h | 100.0 a | 92.5 a-h | 100.0 a  | 2602 a-d | 66.9 a-g                   | 100.0 a | 89.8 a-c | 100.0 a | 96.9 a-c | 2702 a-g | HS         |
| TY/Nei9008-37-3-B    | 100.0 a               | 94.2 a-c | 100.0 a | 96.0 a-e | 100.0 a  | 2580 a-e | 66.6 a-g                   | 100.0 a | 89.1 a-d | 100.0 a | 92.2 a-g | 2718 a-e | HS         |
| Nei9008/TY-23-1-B    | 100.0 a               | 84.1 b-l | 100.0 a | 90.3 a-l | 100.0 a  | 2356 h-n | 46.1 j-m                   | 100.0 a | 75.3 e-i | 100.0 a | 76.4 kl  | 2572 e-m | HS         |
| TY/TF-27-1-B         | 100.0 a               | 77.8 g-m | 100.0 a | 76.1 k-p | 98.9 a-c | 2524 a-h | 74.0 a-c                   | 100.0 a | 80.6 b-g | 100.0 a | 86.0 d-k | 2508 j-m | HS         |
| Nei9008              | 93.8 b                | 33.1 q   | 94.3 b  | 21.4 s   | 73.6 e   | 1917 p   | 37.7 m                     | 100.0 a | 44.5 l   | 96.9 b  | 33.5 m   | 1669 q   | MS         |
| Takpha1              | 100.0 a               | 47.7 p   | 98.7 a  | 59.4 qr  | 96.1 a-d | 2039 op  | 45.1 k-m                   | 100.0 a | 47.8 kl  | 100.0 a | 41.7 m   | 2065 p   | MS         |
| Tein Leang Khan Kaen | 100.0 a               | 95.9 ab  | 100.0 a | 95.2 a-f | 100.0 a  | 2632 a-c | 84.0 a                     | 100.0 a | 85.4 a-f | 100.0 a | 97.1 a-c | 2745 a-c | HS         |
| Tein Ban Kao         | 100.0 a               | 100.0 a  | 100.0 a | 100.0 a  | 100.0 a  | 2573 a-f | 55.1 d-m                   | 100.0 a | 90.0 a-c | 100.0 a | 100.0 a  | 2800 a   | HS         |
| Tein Lai-52          | 100.0 a               | 91.6 a-h | 100.0 a | 95.2 a-f | 100.0 a  | 2675 a   | 73.5 a-c                   | 100.0 a | 95.7 a   | 100.0 a | 99.4 ab  | 2722 a-e | HS         |
| Tein Ayutthaya 60    | 100.0 a               | 95.7 ab  | 100.0 a | 97.2 a-c | 100.0 a  | 2651 ab  | 76.0 ab                    | 100.0 a | 90.6 ab  | 100.0 a | 100.0 a  | 2760 ab  | HS         |
| CV (%)               | 2.0                   | 7.5      | 1.9     | 8.6      | 4.7      | 3.2      | 16.6                       | 7.9     | 10.2     | 1.9     | 6.0      | 4.7      | -          |

Means followed by different letters within the same column are significantly different based on LSD at  $P \leq 0.05$ . HR= 0%infection (no symptom), R=1-10% infection, MR=11-25% infection, MS=26-50%infection, S=51-75% infection and HS=76-100% infection.
